# Supplementary material for: The role of non-covalent interactions in 4-hydroxybenzylamine macrocyclisation: computational and synthetic evidence
Source: Royal Society of Chemistry journal article supplement (doi:10.1039/d3ra08508b), 2024-01-01
Supplement: d3ra08508b1.pdf [file d3ra08508b1.pdf]

SUPPLEMENTARY INFORMATION

**The role of non-covalent interactions in 4-hydroxybenzylamine  
macrocyclisation: computational and synthetic evidence**

Andrés Gonzalez-Oñate, Jorge Alí-Torres, Rodolfo Quevedo

*Universidad Nacional de Colombia, Sede Bogotá, Facultad de Ciencias, Departamento de  
Química, Carrera 30 No. 45-03, Bogotá, Colombia*

**4-hydroxybenzylamine 1 reaction with formaldehyde**

Formaldehyde (37%, 5 mL) was added to a 4-hydroxybenzylamine **1** solution (500 mg, 4 mmol) in 10 mL solvent (ethanol, dioxane, DMF and acetonitrile). The mixture was kept without stirring at room temperature for 24 h; distilled water (15 mL) was then added, and product was extracted with dichloromethane (3 x 5 mL). The organic phase was washed with water (3 x 5mL), dried with anhydrous sodium sulphate and concentrated. The resulting product was characterised by melting point, ultra-performance liquid chromatography-mass spectrometry (UPLC-MS) and nuclear magnetic resonance (NMR) spectroscopy ( $^1\text{H}$  and  $^{13}\text{C}$ ).

Azacyclophane **2** ( $1^3,1^4,3^3,3^4$ -tetrahydro- $1^2\text{H},3^2\text{H}$ -1,3(3,6)-bis(1,3-benzoxazine)cyclobutaphane):  $\text{C}_{18}\text{H}_{18}\text{N}_2\text{O}_2$ . Yellow Solid, m.p. 190-192 °C.  $^1\text{H}$ -NMR ( $\text{CDCl}_3$ ),  $\delta/\text{ppm}$ : 7.27 – 6.67 (aromatic protons), 4.89 – 4.75 (benzoxazinic methylenes), 4.01 – 3.66 (benzylic methylenes).  $^{13}\text{C}$ -NMR ( $\text{CDCl}_3$ ),  $\delta/\text{ppm}$ : 153.6, 130.5, 130.2, 128.6, 128.4, 120.0, 116.4, 81.9, 55.1, 49.8. ESI-MS ( $m/z$ ): 271.4143 [ $\text{M}+\text{H}-24$ ] $^+$  (Calc. 271.4146), 136,0756 [ $\text{M}+2\text{H}-12$ ] $^{2+}$  (Calc. 136,0762). Yield: in ethanol: 52 %, in dioxane: 55 %, in DMF: 61 %, in acetonitrile: 59%.

**<sup>1</sup>H-NMR spectrum of 4-hydroxybenzylamine 1.**

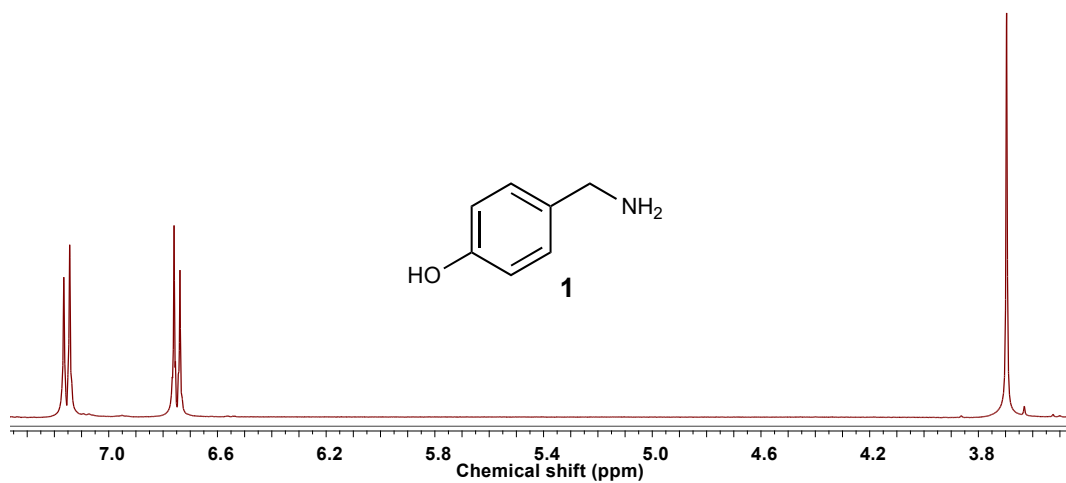

**<sup>1</sup>H-NMR spectrum of azacyclophane 2 synthesized in dioxane.**

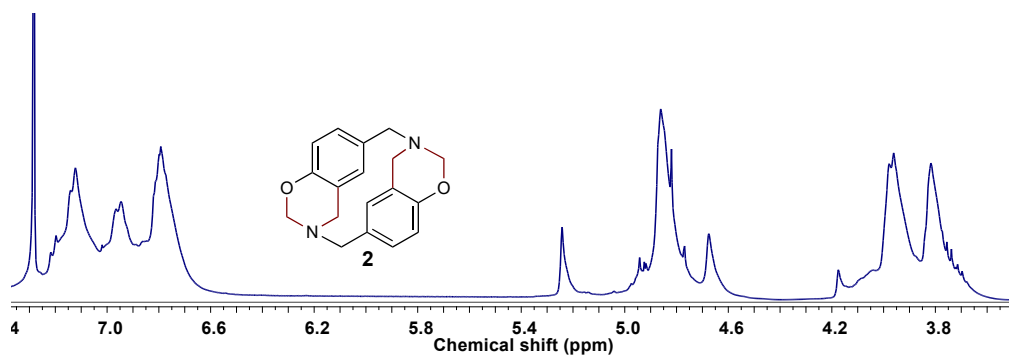

**<sup>13</sup>C-NMR spectrum of azacyclophane 2 synthesized in dioxane.**

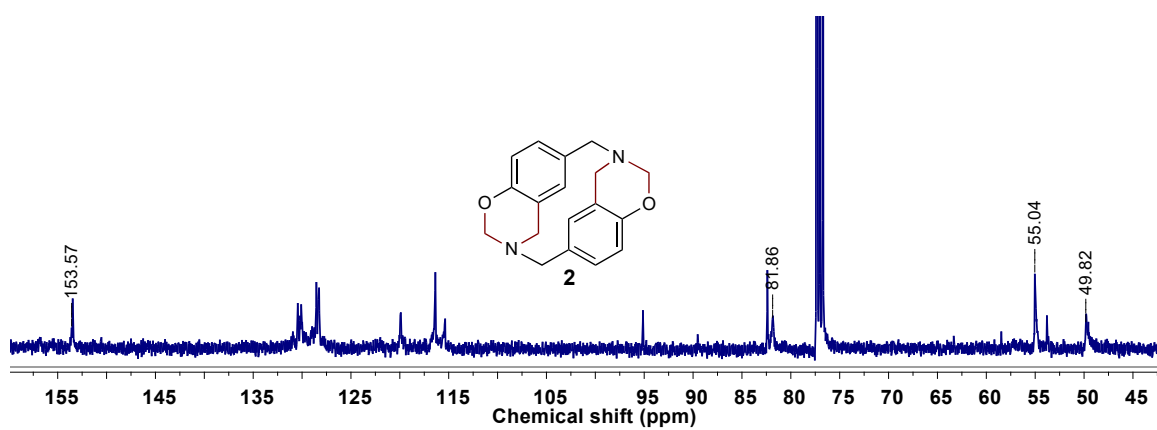

**HMBC spectrum of azacyclophane 2 synthesized in dioxane.**

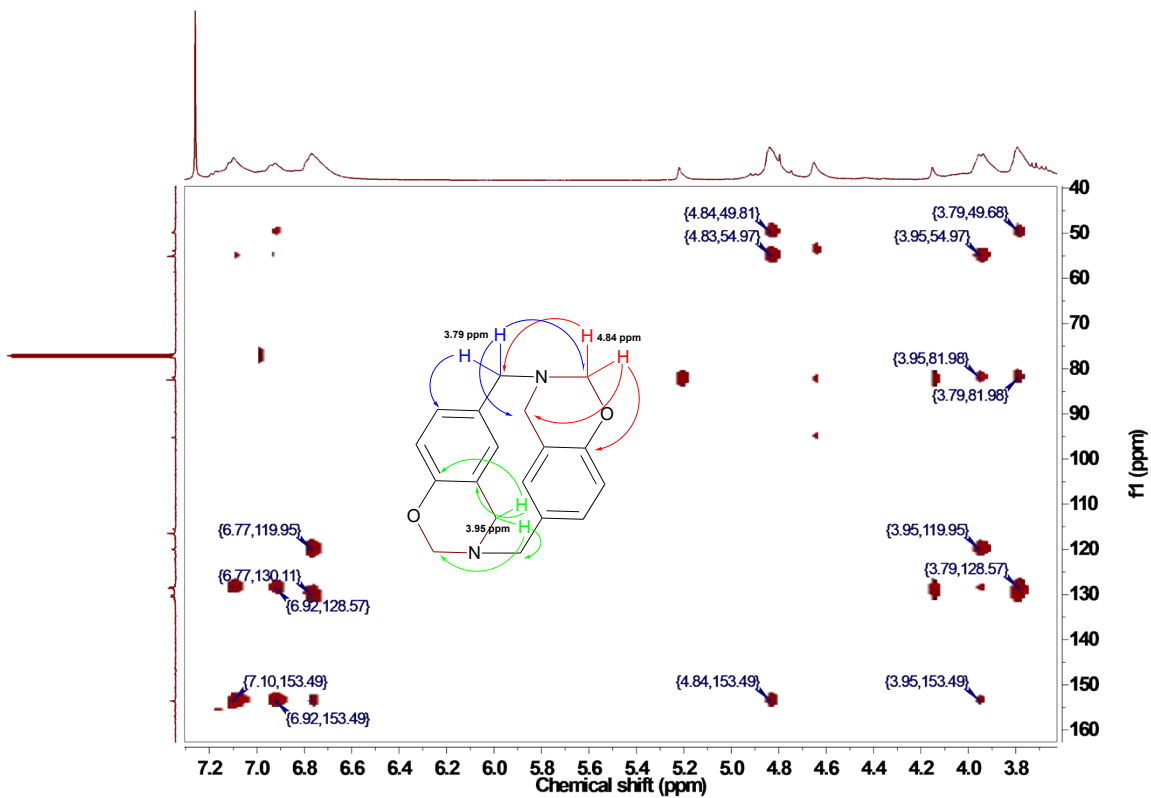

ESI-MS spectrum of azacyclophane 4 (derivative of azacyclophane 2 synthesized in dioxane).

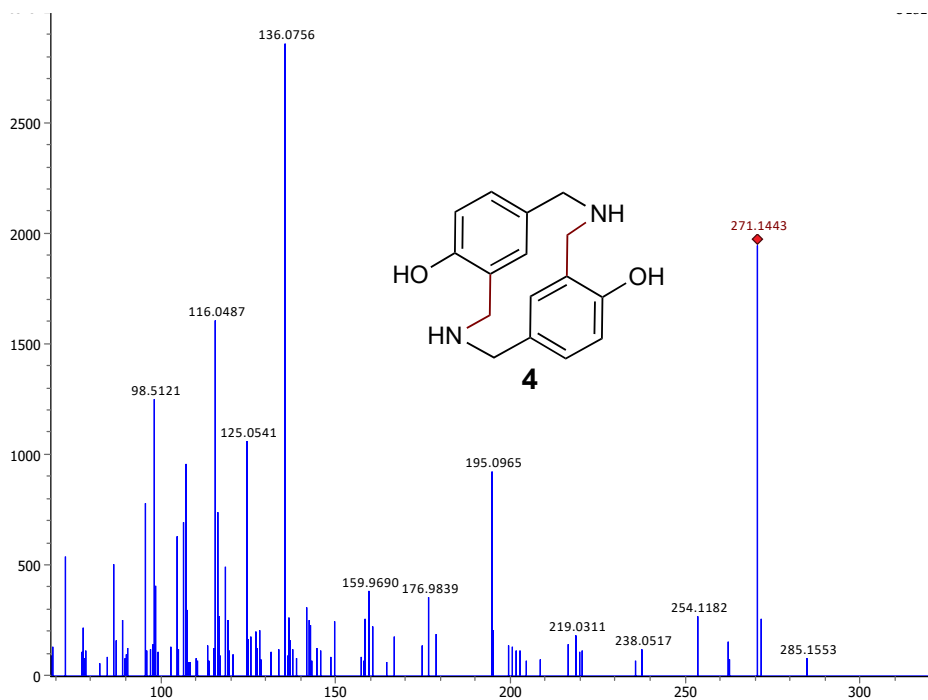

**ESI-MS spectrum of linear dimer 3 (by-product of the synthesis in dioxane).**

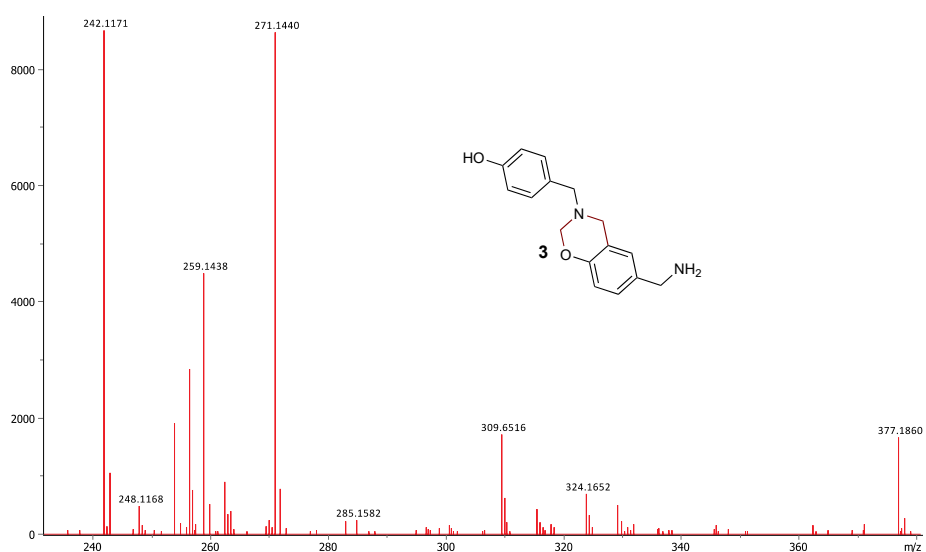

**<sup>1</sup>H-NMR spectrum of azacyclophane 2 synthesized in acetonitrile.**

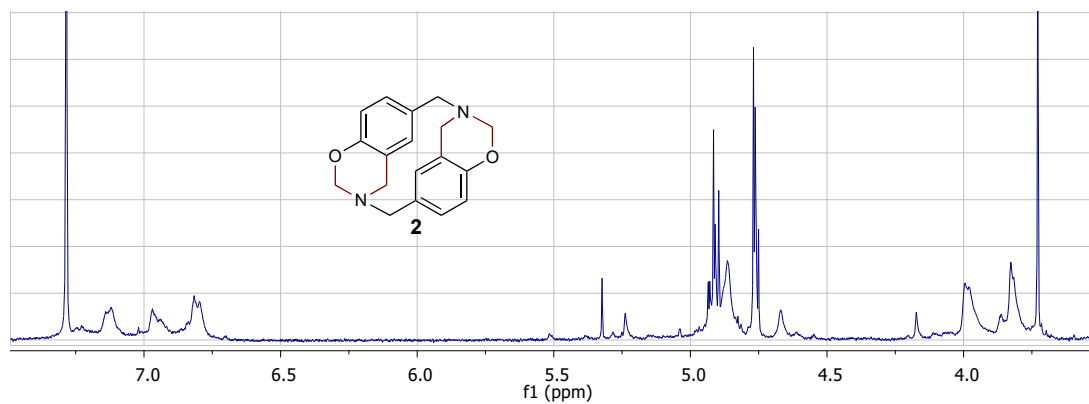

**<sup>1</sup>H-NMR spectrum of azacyclophane 2 synthesized in ethanol.**

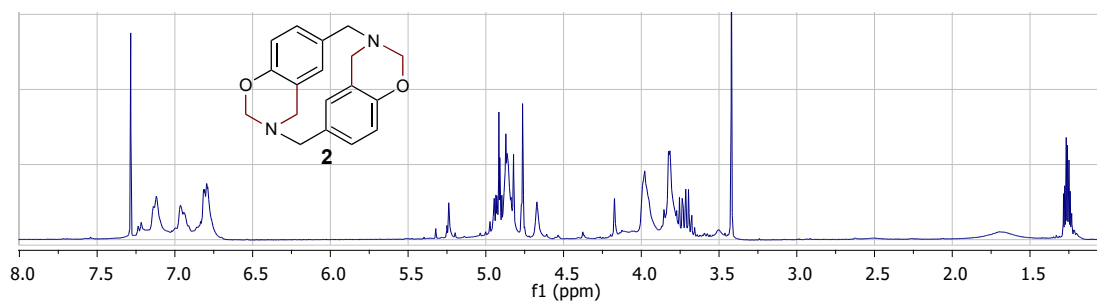

## Geometrical Coordinates

### Structure 1

18

|   | Energy: -402.194559 | Enthalpy: -402.005177 | Free Energy: -402.047893 |
|---|---------------------|-----------------------|--------------------------|
| C | -1.04543            | -1.21793              | 0.12445                  |
| C | 0.33138             | -1.04415              | 0.23749                  |
| C | 0.91198             | 0.23436               | 0.19128                  |
| C | 0.06639             | 1.33477               | 0.02020                  |
| C | -1.31921            | 1.17749               | -0.09188                 |
| C | -1.87573            | -0.10249              | -0.03852                 |
| H | -1.49264            | -2.20622              | 0.16008                  |
| H | 0.97712             | -1.90937              | 0.35179                  |
| H | 0.48875             | 2.33584               | -0.02775                 |
| H | -1.95821            | 2.04786               | -0.22671                 |
| C | 2.40903             | 0.41507               | 0.34938                  |
| H | 2.69451             | 0.22049               | 1.39200                  |
| H | 2.65791             | 1.47056               | 0.14998                  |
| O | -3.22539            | -0.33096              | -0.14519                 |
| H | -3.69351            | 0.50755               | -0.25015                 |
| N | 3.15781             | -0.53911              | -0.48040                 |
| H | 2.99709             | -0.36338              | -1.46913                 |
| H | 4.15692             | -0.46462              | -0.31023                 |

### Structure 1-GD3BJ

18

|   | Energy: -402.194586 | Enthalpy: -402.035145 | Free Energy: -402.077840 |
|---|---------------------|-----------------------|--------------------------|
| C | -1.03972            | -1.21737              | 0.12665                  |
| C | 0.33592             | -1.04042              | 0.23970                  |

|   |          |          |          |
|---|----------|----------|----------|
| C | 0.91165  | 0.23897  | 0.19205  |
| C | 0.06581  | 1.33736  | 0.01899  |
| C | -1.31859 | 1.17682  | -0.09288 |
| C | -1.87146 | -0.10407 | -0.03778 |
| H | -1.48538 | -2.20587 | 0.16307  |
| H | 0.98564  | -1.90196 | 0.35451  |
| H | 0.48766  | 2.33804  | -0.03091 |
| H | -1.96002 | 2.04463  | -0.22942 |
| C | 2.40640  | 0.42013  | 0.34576  |
| H | 2.69390  | 0.23657  | 1.38951  |
| H | 2.65626  | 1.47234  | 0.13238  |
| O | -3.22016 | -0.33480 | -0.14461 |
| H | -3.68802 | 0.50358  | -0.25049 |
| N | 3.14568  | -0.54636 | -0.47652 |
| H | 2.96430  | -0.38998 | -1.46477 |
| H | 4.14707  | -0.46302 | -0.32632 |

Structure 1a

36

|   | Energy: -804.418836 | Enthalpy: -804.020737 | Free Energy: -804.084480 |
|---|---------------------|-----------------------|--------------------------|
| C | 1.39984             | -1.49138              | -1.16252                 |
| C | 0.10913             | -1.94186              | -0.88638                 |
| C | -0.33607            | -2.03617              | 0.44207                  |
| C | 0.56602             | -1.76492              | 1.47964                  |
| C | 1.84968             | -1.30673              | 1.18954                  |
| C | 2.27866             | -1.12742              | -0.13291                 |
| H | 2.51588             | -1.04469              | 2.00795                  |
| H | 1.71819             | -1.40941              | -2.20075                 |
| H | -0.56241            | -2.21170              | -1.69627                 |
| H | 0.22577             | -1.86475              | 2.50528                  |

|   |          |          |          |
|---|----------|----------|----------|
| O | -1.61171 | -2.38977 | 0.76011  |
| C | 3.60607  | -0.47643 | -0.44234 |
| N | 3.41518  | 0.93588  | -0.88809 |
| H | 4.15581  | -1.05772 | -1.19768 |
| H | 4.22332  | -0.44688 | 0.46036  |
| H | 2.98791  | 0.94104  | -1.81300 |
| H | 4.32134  | 1.39119  | -0.99126 |
| H | -2.25786 | -1.95039 | 0.14425  |
| H | -0.22590 | 1.86549  | 2.50503  |
| H | -2.51596 | 1.04520  | 2.00783  |
| C | -0.56610 | 1.76534  | 1.47940  |
| C | -1.84973 | 1.30703  | 1.18937  |
| O | 1.61163  | 2.39006  | 0.75981  |
| C | 0.33603  | 2.03632  | 0.44180  |
| N | -3.41509 | -0.93606 | -0.88817 |
| H | -2.98801 | -0.94115 | -1.81316 |
| H | 2.25785  | 1.95053  | 0.14415  |
| C | -2.27864 | 1.12732  | -0.13304 |
| H | -4.32121 | -1.39147 | -0.99116 |
| C | -3.60603 | 0.47622  | -0.44234 |
| H | -4.22316 | 0.44659  | 0.46044  |
| C | -0.10910 | 1.94160  | -0.88664 |
| C | -1.39978 | 1.49101  | -1.16271 |
| H | 0.56247  | 2.21123  | -1.69658 |
| H | -4.15593 | 1.05748  | -1.19759 |
| H | -1.71807 | 1.40873  | -2.20094 |

**Structure 1b**

36

Energy: -804.399745    Enthalpy: -804.009549    Free Energy: -804.079370

|   |          |          |          |
|---|----------|----------|----------|
| C | 2.09510  | 1.32435  | 1.24606  |
| C | 0.95466  | 2.12184  | 1.39153  |
| C | 0.19440  | 2.44521  | 0.26713  |
| C | 0.58299  | 1.99300  | -0.99765 |
| C | 1.72035  | 1.20047  | -1.12410 |
| C | 2.49267  | 0.84642  | -0.00607 |
| H | 2.00786  | 0.82279  | -2.10038 |
| H | 2.67300  | 1.06390  | 2.12986  |
| H | 0.65248  | 2.46890  | 2.37769  |
| H | -0.02197 | 2.25078  | -1.86085 |
| O | -0.96737 | 3.18606  | 0.34605  |
| C | 3.71824  | -0.03379 | -0.15929 |
| N | 3.42379  | -1.21994 | -0.97339 |
| H | 4.10874  | -0.26561 | 0.84639  |
| H | 4.51024  | 0.52405  | -0.67727 |
| H | 2.74395  | -1.82609 | -0.51725 |
| H | 4.26562  | -1.76334 | -1.14185 |
| H | -1.09300 | 3.49681  | 1.25234  |
| H | 0.01937  | -2.25478 | -1.86029 |
| H | -2.01060 | -0.82703 | -2.10004 |
| C | -0.58443 | -1.99519 | -0.99682 |
| C | -1.72188 | -1.20281 | -1.12338 |
| O | 0.96758  | -3.18573 | 0.34722  |
| C | -0.19423 | -2.44493 | 0.26836  |
| N | -3.42416 | 1.21918  | -0.97345 |
| H | -2.74441 | 1.82573  | -0.51772 |
| H | 1.09427  | -3.49493 | 1.25389  |
| C | -2.49276 | -0.84652 | -0.00504 |
| H | -4.26610 | 1.76238  | -1.14208 |



|   |          |          |          |
|---|----------|----------|----------|
| C | -3.71840 | 0.03353  | -0.15850 |
| H | -4.51049 | -0.52468 | -0.67593 |
| C | -0.95300 | -2.11926 | 1.39310  |
| C | -2.09361 | -1.32201 | 1.24751  |
| H | -0.64956 | -2.46438 | 2.37956  |
| H | -4.10865 | 0.26600  | 0.84713  |
| H | -2.67038 | -1.05979 | 2.13152  |

Structure 1c

36

|   | Energy: -804.408074 | Enthalpy: -804.021209 | Free Energy: -804.092231 |
|---|---------------------|-----------------------|--------------------------|
| C | -3.37102            | -0.22858              | -1.12913                 |
| C | -2.12190            | -0.73262              | -0.75881                 |
| C | -1.79597            | -0.87413              | 0.59883                  |
| C | -2.74096            | -0.50479              | 1.56803                  |
| C | -3.98102            | -0.00254              | 1.17943                  |
| C | -4.32285            | 0.15205               | -0.17399                 |
| H | -4.70313            | 0.26931               | 1.94718                  |
| H | -3.60728            | -0.13417              | -2.18748                 |
| H | -1.40176            | -1.01932              | -1.52009                 |
| H | -2.48798            | -0.62771              | 2.61661                  |
| O | -0.60159            | -1.35944              | 1.02751                  |
| C | -5.65443            | 0.75380               | -0.58484                 |
| N | -5.69887            | 2.22453               | -0.69443                 |
| H | -5.95870            | 0.34773               | -1.55642                 |
| H | -6.42997            | 0.46072               | 0.13219                  |
| H | -5.45584            | 2.64903               | 0.19802                  |
| H | -5.00211            | 2.54574               | -1.36313                 |
| H | -0.01277            | -1.63919              | 0.27611                  |
| H | 2.62002             | 2.15684               | 1.39777                  |

|   |         |          |          |
|---|---------|----------|----------|
| H | 1.66870 | -0.13654 | 1.34718  |
| C | 3.08348 | 1.37831  | 0.80073  |
| C | 2.56115 | 0.08869  | 0.76966  |
| O | 4.70101 | 2.96829  | 0.12735  |
| C | 4.22920 | 1.68377  | 0.05563  |
| N | 1.28966 | -2.35029 | -0.77092 |
| H | 1.40335 | -1.93687 | -1.69496 |
| H | 5.49286 | 3.06211  | -0.41825 |
| C | 3.16223 | -0.92089 | -0.00279 |
| H | 0.99354 | -3.31536 | -0.91232 |
| C | 2.58720 | -2.31851 | -0.04495 |
| H | 2.39092 | -2.68157 | 0.97028  |
| C | 4.84311 | 0.69466  | -0.71735 |
| C | 4.30590 | -0.59589 | -0.74059 |
| H | 5.73546 | 0.92519  | -1.29538 |
| H | 3.32376 | -2.99705 | -0.49718 |
| H | 4.79538 | -1.35942 | -1.34082 |

**Structure 1d**

36

Energy: -804.400353    Enthalpy: -804.012948    Free Energy: -804.085862

|   |         |          |          |
|---|---------|----------|----------|
| C | 2.63163 | 1.05204  | 0.00621  |
| C | 1.35979 | 0.50632  | -0.19581 |
| C | 1.19669 | -0.88150 | -0.19115 |
| C | 2.30405 | -1.71322 | 0.01631  |
| C | 3.56254 | -1.15320 | 0.22070  |
| C | 3.74903 | 0.23902  | 0.22278  |
| H | 4.42321 | -1.79838 | 0.36842  |
| H | 2.74839 | 2.13338  | -0.00768 |
| H | 0.50438 | 1.15577  | -0.36535 |

|   |          |          |          |
|---|----------|----------|----------|
| H | 2.16290  | -2.78953 | 0.01163  |
| O | -0.01977 | -1.48331 | -0.38918 |
| C | 5.11755  | 0.84043  | 0.47485  |
| N | 6.15487  | 0.17423  | -0.32589 |
| H | 5.05778  | 1.92893  | 0.30924  |
| H | 5.39336  | 0.70120  | 1.52900  |
| H | 5.99472  | 0.32220  | -1.31931 |
| H | 7.07719  | 0.53817  | -0.10266 |
| H | -0.71190 | -0.81762 | -0.52659 |
| H | -2.82168 | 1.62844  | -2.23043 |
| H | -3.25119 | -0.80141 | -1.83055 |
| C | -2.88514 | 1.23265  | -1.22174 |
| C | -3.12880 | -0.12234 | -0.99238 |
| O | -2.48524 | 3.42512  | -0.41874 |
| C | -2.72553 | 2.10357  | -0.13785 |
| N | -2.87872 | -2.97285 | -0.43499 |
| H | -1.86804 | -2.98755 | -0.31363 |
| H | -2.41598 | 3.93043  | 0.40192  |
| C | -3.21317 | -0.63882 | 0.31199  |
| H | -3.21850 | -3.92651 | -0.35730 |
| C | -3.51958 | -2.10639 | 0.55885  |
| H | -4.60354 | -2.26357 | 0.47320  |
| C | -2.80240 | 1.60901  | 1.16778  |
| C | -3.04012 | 0.24830  | 1.38134  |
| H | -2.66568 | 2.27766  | 2.01515  |
| H | -3.25299 | -2.34587 | 1.60166  |
| H | -3.08464 | -0.12510 | 2.40155  |

Structure 1e

36

Energy: -804.420779    Enthalpy: -804.098948    Free Energy: -804.161210

|   |          |          |          |
|---|----------|----------|----------|
| C | 1.26078  | -1.45398 | -1.16263 |
| C | -0.04902 | -1.80810 | -0.84549 |
| C | -0.46260 | -1.84957 | 0.49484  |
| C | 0.47996  | -1.60583 | 1.50291  |
| C | 1.78288  | -1.24803 | 1.17182  |
| C | 2.18919  | -1.13842 | -0.16391 |
| H | 2.48427  | -1.00357 | 1.96480  |
| H | 1.55686  | -1.40856 | -2.20918 |
| H | -0.75832 | -2.04254 | -1.63262 |
| H | 0.15657  | -1.64963 | 2.53722  |
| O | -1.74225 | -2.11978 | 0.85634  |
| C | 3.54780  | -0.59239 | -0.52104 |
| N | 3.43721  | 0.83126  | -0.95097 |
| H | 4.02155  | -1.20678 | -1.30032 |
| H | 4.19928  | -0.61281 | 0.35708  |
| H | 2.96343  | 0.87401  | -1.85144 |
| H | 4.36394  | 1.23008  | -1.09237 |
| H | -2.37746 | -1.76063 | 0.17724  |
| H | -0.15628 | 1.64940  | 2.53698  |
| H | -2.48403 | 1.00333  | 1.96475  |
| C | -0.47979 | 1.60569  | 1.50269  |
| C | -1.78274 | 1.24789  | 1.17172  |
| O | 1.74232  | 2.11985  | 0.85594  |
| C | 0.46265  | 1.84959  | 0.49454  |
| N | -3.43737 | -0.83135 | -0.95054 |
| H | -2.96353 | -0.87436 | -1.85097 |
| H | 2.37751  | 1.76068  | 0.17681  |
| C | -2.18919 | 1.13843  | -0.16397 |

|   |          |          |          |
|---|----------|----------|----------|
| H | -4.36414 | -1.23009 | -1.09193 |
| C | -3.54784 | 0.59243  | -0.52099 |
| H | -4.19935 | 0.61314  | 0.35710  |
| C | 0.04893  | 1.80823  | -0.84575 |
| C | -1.26090 | 1.45411  | -1.16277 |
| H | 0.75814  | 2.04278  | -1.63292 |
| H | -4.02150 | 1.20666  | -1.30046 |
| H | -1.55711 | 1.40879  | -2.20929 |

**Structure 1f**

36

|   | Energy: -804.403349 | Enthalpy: -804.081909 | Free Energy: -804.148090 |
|---|---------------------|-----------------------|--------------------------|
| C | 1.97036             | 1.72149               | 0.83634                  |
| C | 0.71896             | 2.30448               | 1.06028                  |
| C | -0.30036            | 2.12078               | 0.12638                  |
| C | -0.07447            | 1.36421               | -1.02486                 |
| C | 1.17686             | 0.79326               | -1.23196                 |
| C | 2.21969             | 0.96247               | -0.30987                 |
| H | 1.35294             | 0.18075               | -2.10920                 |
| H | 2.75946             | 1.86270               | 1.57134                  |
| H | 0.53880             | 2.88411               | 1.96331                  |
| H | -0.88829            | 1.20158               | -1.72254                 |
| O | -1.56575            | 2.64379               | 0.30286                  |
| C | 3.58418             | 0.35331               | -0.56279                 |
| N | 3.47242             | -0.97427              | -1.17297                 |
| H | 4.15118             | 0.36615               | 0.38438                  |
| H | 4.14238             | 0.98944               | -1.26319                 |
| H | 3.02163             | -1.62340              | -0.53137                 |
| H | 4.38781             | -1.34133              | -1.41418                 |
| H | -1.59328            | 3.16382               | 1.11619                  |

|   |          |          |          |
|---|----------|----------|----------|
| H | 0.39260  | -2.85968 | -1.16731 |
| H | -1.91697 | -2.14424 | -1.76028 |
| C | -0.20436 | -2.27546 | -0.47541 |
| C | -1.49772 | -1.87340 | -0.79549 |
| O | 1.63856  | -2.29534 | 1.01973  |
| C | 0.34726  | -1.89536 | 0.75036  |
| N | -3.52912 | 0.56185  | -1.18697 |
| H | -3.09252 | 1.34020  | -0.69618 |
| H | 1.90920  | -1.94474 | 1.87842  |
| C | -2.26310 | -1.10231 | 0.09047  |
| H | -4.45100 | 0.86507  | -1.49063 |
| C | -3.63656 | -0.60627 | -0.29722 |
| H | -4.17122 | -1.39090 | -0.84467 |
| C | -0.39529 | -1.13305 | 1.65036  |
| C | -1.69396 | -0.74689 | 1.31530  |
| H | 0.04100  | -0.82627 | 2.59766  |
| H | -4.21312 | -0.40573 | 0.62129  |
| H | -2.26499 | -0.14182 | 2.01448  |

**Structure 1g**

36

|   |                     |                       |                          |
|---|---------------------|-----------------------|--------------------------|
|   | Energy: -804.408855 | Enthalpy: -804.087082 | Free Energy: -804.156299 |
| C | -2.76454            | 0.50242               | -0.86417                 |
| C | -1.73729            | 1.14723               | -0.17218                 |
| C | -1.36885            | 0.71086               | 1.11072                  |
| C | -2.05449            | -0.37251              | 1.68118                  |
| C | -3.08015            | -0.99930              | 0.97868                  |
| C | -3.45790            | -0.57753              | -0.30568                 |
| H | -3.59361            | -1.84348              | 1.43434                  |
| H | -3.03007            | 0.85021               | -1.86041                 |

|   |          |          |          |
|---|----------|----------|----------|
| H | -1.22217 | 1.99053  | -0.62141 |
| H | -1.75705 | -0.71312 | 2.66759  |
| O | -0.37204 | 1.28428  | 1.82531  |
| C | -4.61793 | -1.22609 | -1.03222 |
| N | -5.95036 | -0.66962 | -0.73308 |
| H | -4.46726 | -1.14773 | -2.11471 |
| H | -4.65296 | -2.29564 | -0.79653 |
| H | -6.14227 | -0.75108 | 0.26308  |
| H | -5.96236 | 0.32601  | -0.94395 |
| H | 0.19939  | 1.86313  | 1.24955  |
| H | 1.67874  | -2.43252 | 0.04560  |
| H | 0.62170  | -0.25765 | -0.49967 |
| C | 2.28572  | -1.55076 | -0.12818 |
| C | 1.70284  | -0.32634 | -0.43571 |
| O | 4.19989  | -2.88204 | 0.26613  |
| C | 3.67825  | -1.65274 | -0.03831 |
| N | 1.38648  | 2.79850  | 0.30467  |
| H | 2.17177  | 2.89940  | 0.94588  |
| H | 5.16390  | -2.83186 | 0.30290  |
| C | 2.48742  | 0.81551  | -0.65988 |
| H | 1.03923  | 3.73711  | 0.11322  |
| C | 1.85036  | 2.15151  | -0.94964 |
| H | 0.97202  | 2.01968  | -1.58954 |
| C | 4.47813  | -0.52865 | -0.26128 |
| C | 3.87759  | 0.69383  | -0.57042 |
| H | 5.56114  | -0.60624 | -0.20026 |
| H | 2.56183  | 2.78670  | -1.49499 |
| H | 4.50735  | 1.56176  | -0.75088 |

Structure 1h

|   | Energy: -804.407201 | Enthalpy: -804.085597 | Free Energy: -804.152525 |
|---|---------------------|-----------------------|--------------------------|
| C | 1.16568             | -0.53086              | -1.37398                 |
| C | -0.01248            | -1.23007              | -1.12506                 |
| C | -0.14762            | -1.97678              | 0.05214                  |
| C | 0.92857             | -2.04693              | 0.94279                  |
| C | 2.10432             | -1.34084              | 0.68184                  |
| C | 2.23756             | -0.56067              | -0.47369                 |
| H | 2.93054             | -1.38176              | 1.38433                  |
| H | 1.24686             | 0.06150               | -2.28226                 |
| H | -0.83824            | -1.18217              | -1.82757                 |
| H | 0.81937             | -2.63607              | 1.84804                  |
| O | -1.30014            | -2.63452              | 0.36686                  |
| C | 3.47138             | 0.27756               | -0.74107                 |
| N | 4.65508             | -0.24123              | -0.04600                 |
| H | 3.60318             | 0.36330               | -1.83267                 |
| H | 3.29878             | 1.29763               | -0.37324                 |
| H | 4.91562             | -1.15338              | -0.41336                 |
| H | 5.44815             | 0.37988               | -0.17533                 |
| H | -2.08015            | -2.17770              | -0.03392                 |
| H | -0.10464            | 3.13044               | -1.26982                 |
| H | -2.27021            | 2.08042               | -1.87740                 |
| C | -0.58608            | 2.42624               | -0.59990                 |
| C | -1.80123            | 1.83029               | -0.92886                 |
| O | 1.27570             | 2.63466               | 0.84959                  |
| C | 0.05259             | 2.07215               | 0.59079                  |
| N | -3.70659            | -1.23216              | -0.14353                 |
| H | -3.93720            | -1.34616              | 0.84144                  |
| H | 1.67158             | 2.20494               | 1.61954                  |



|   |          |          |          |
|---|----------|----------|----------|
| C | -2.40809 | 0.89109  | -0.08551 |
| H | -4.44315 | -1.70886 | -0.65839 |
| C | -3.69158 | 0.20593  | -0.50434 |
| H | -3.78198 | 0.26958  | -1.59278 |
| C | -0.55416 | 1.16689  | 1.46324  |
| C | -1.77609 | 0.58980  | 1.12456  |
| H | -0.05539 | 0.87959  | 2.38453  |
| H | -4.56215 | 0.73354  | -0.08437 |
| H | -2.20147 | -0.14490 | 1.80067  |
